# Supplementary material for: Characterization and source apportionment of aerosol light scattering in a typical polluted city in the Yangtze River Delta, China
Source: Copernicus journal article supplement (doi:10.5194/acp-20-10193-2020), 2020-09-03
Supplement: Supplementary file 1 [file acp-20-10193-2020-supplement.pdf]

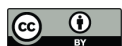

*Supplement of*

**Characterization and source apportionment of aerosol light scattering in a typical polluted city in the Yangtze River Delta, China**

**Dong Chen et al.**

*Correspondence to:* Yu Zhao (yuzhao@nju.edu.cn)

The copyright of individual parts of the supplement might differ from the CC BY 4.0 License.

9     **Number of tables: 5**

**Number of figures: 15**

10    **Table list**

11    Table S1. The hygroscopic growth factors (GF) of particles at different particle sizes  
12    and RH levels in Nanjing from previous studies (Li et al., 2015; Wu, 2014; Xu et al.,  
13    2015; Yu et al., 2015; Zhang et al., 2011).

14    Table S2. The source apportionment of the primary and secondary aerosols for  
15    accumulation mode particles at NJU (Unit: %).

16    Table S3. The same as Table S2 but for PAES.

17    Table S4. The same as Table S2 but for NUIST.

18    Table S5 The contributions of chemical components to the light scattering for  
19    accumulation mode particles based on the Mie theory (Unit: %).

20    **Figure list**

21    Figure S1. The locations of NJU, PAES and NUIST sites in Nanjing. The map data  
22    provided by © Google (Google Earth) are freely available for academic use  
23    (<http://www.google.cn/intl/zh-CN/earth/>).

24    Figure S2. A set of size-resolved particle filter samples on 25 Dec 2015 at NJU. The  
25    measured  $PM_{1.8}$  and  $PM_{2.5}$  were 128 and  $141\mu g/m^3$ , respectively.

26    Figure S3. Correlation between the mass concentrations of  $PM_{1.8}$  collected with  
27    MOUDI impactor and  $PM_{2.5}$  collected with TH-150C sampler at NJU.

28    Figure S4. Correlation between MSOC and total OC concentrations for all the  
29    samples collected in this work. The red line indicates linear regression results with K  
30    as slope (intercept is set at zero).

31    Figure S5. The size distribution of mass concentrations of particles and their main  
32    chemical components for the three pollution level periods.

33    Figure S6. The relationship between the reconstructed and measured PM mass  
34    concentrations at the three sites.

35    Figure S7. The size distribution of mass concentrations of particles and their main  
36    chemical components at NJU, PAES and NUIST.

37 Figure S8. Linear regressions between the measured daily scattering coefficients and  
38 those calculated with the IMPROVE1999 algorithm (a) and the IMPROVE2007  
39 algorithm (b) at the three sites.

40 Figure S9. Linear regressions between the mass scattering efficiencies (MSE) of  
41  $\text{NH}_4\text{NO}_3$  (a) and  $(\text{NH}_4)_2\text{SO}_4$  (b) estimated with the Mie theory and those with the two  
42 version of US IMPROVE algorithms.

43 Figure S10 The collective proportions of sea salt and soil dust to the total  $\text{PM}_{2.5}$   
44 scattering coefficient at the three sites

45 Figure S11. Hygroscopic growth curve of  $\text{PM}_{2.5}$  at NJU.

46 Figure S12. The correlation between the scattering coefficients estimated by  $f(\text{RH})$   
47 and those simulated with Mie theory under the ambient conditions.

48 Figure S13. The comparison of the observed scattering coefficients and those  
49 estimated with the external, internal, core-shell mixture assumption under the ambient  
50 condition at NJU.

51 Figure S14. The box plots of the ratios of light absorption BrC mass to the total BrC  
52 mass under the three pollution levels. The box plots indicate the mean concentration  
53 (square symbols) and the maximum, 99th, 75th, 50th, 25th, 1st percentiles, and  
54 minimum.

55 Figure S15. The source profiles for accumulation mode particles from the PMF model  
56 at NJU (a), PAES (b) and NUIST (c).

## S1. IMPROVE1999 and IMPROVE2007 algorithms

The PM<sub>2.5</sub> scattering coefficient could be calculated with two IMPROVE algorithms, as described in Pitchford et al. (2007). Briefly, the IMPROVE1999 and IMPROVE2007 algorithms are expressed with Eqs. (S1) and (S2), respectively:

$$b_{sca} \approx 3 \times f(RH)[Sulfate] + 3 \times f(RH)[Nitrate] + 4 \times [Organic Mass] + 1 \times [Fine soil] \quad (S1)$$

$$b_{sca} \approx 2.2 \times f_s(RH)[Small Sulfate] + 4.8 \times f_L(RH)[Large Sulfate] + 2.4 \times f_s(RH)[Small Nitrate] + 5.1 \times f_L(RH)[Large Nitrate] + 2.8 \times [Small Organic Mass] + 6.1 \times [Large Organic Mass] + 1 \times [Fine soil] + 1.7 \times f_{ss}(RH)[Sea salt] \quad (S2)$$

The four major components in Eq. (S1) are sulfate (assumed to be (NH<sub>4</sub>)<sub>2</sub>SO<sub>4</sub>), nitrate (assumed to be NH<sub>4</sub>NO<sub>3</sub>), organic mass (assumed to be organic compounds), and fine soil (crustal elements plus oxides). The PM<sub>2.5</sub> scattering coefficient can be thus estimated by multiplying the concentrations of the four chemical components by typical component-specific mass scattering efficiencies.  $f(RH)$  denotes the water growth terms for sulfate and nitrate.

IMPROVE2007 separates the large and small particle modes for sulfate, nitrate and OM using a simple mixing model, and different mass scattering efficiencies are used for the two modes (Eq. (S2)). With an assumption of log-normal mass size distribution, the large and small modes are described by the D<sub>g</sub> and geometric standard deviations (σ<sub>g</sub>) at 0.5 μm and 1.5, and 0.2 μm and 2.2, respectively. Empirically, the fraction of each particle component in the large mode can be calculated by dividing the total concentration of the component by 20 μg/m<sup>3</sup>. If the concentration is above 20 μg/m<sup>3</sup>, all the mass is considered to be in the large mode. A sea salt term is added as a particular concern for coastal monitoring sites. The water growth curves for sea salt and the large and small particle modes of sulfate and nitrate can be referred to Pitchford et al. (2007).

84

85 **Tables**

86 **Table S1. The hygroscopic growth factors (GF) of particles at different particle**  
 87 **sizes and RH levels in Nanjing from previous studies (Li et al., 2015; Wu, 2014;**  
 88 **Xu et al., 2015; Yu et al., 2015; Zhang et al., 2011).**

| RH(%) | 80 nm | 130 nm | 200 nm | 398 nm |
|-------|-------|--------|--------|--------|
| 50    | 1.03  | 1.03   | 1.04   | 1.04   |
| 60    | 1.03  | 1.05   | 1.04   | 1.04   |
| 73    | 1.12  | 1.14   | 1.14   | 1.11   |
| 77    | 1.17  | 1.19   | 1.18   | 1.12   |
| 82    | 1.25  | 1.28   | 1.28   | 1.23   |
| 85    | 1.28  | 1.34   | 1.35   | 1.28   |
| 88    | 1.31  | 1.41   | 1.39   | 1.31   |
| 90    | 1.41  | 1.45   | 1.49   | 1.27   |

**Table S2. The source apportionment of the primary and secondary aerosols for accumulation mode particles at NJU (Unit: %).**

| Source               | Primary apportionment<br>by PMF | Secondary aerosol allocation |                                                                 |                      |                       |                      | Total |
|----------------------|---------------------------------|------------------------------|-----------------------------------------------------------------|----------------------|-----------------------|----------------------|-------|
|                      |                                 | Sector category              | Proportions of<br>SO <sub>2</sub> and NO <sub>2</sub> emissions | Proportion<br>of SIA | Proportion<br>of VOCs | Proportion<br>of SOA |       |
| Coal combustion      | 21.5                            | Power plants                 | 41.5                                                            | 10.9                 |                       |                      | 32.3  |
|                      |                                 | Chemical industry            | 13.0                                                            | 3.4                  | 49.0                  | 1.5                  |       |
|                      |                                 | Steel industry               | 13.0                                                            | 3.4                  | 10.0                  | 0.3                  |       |
|                      |                                 | Cement industry              | 7.0                                                             | 1.8                  | -                     |                      |       |
|                      |                                 | Coating industry             | -                                                               |                      | 11.0                  | 0.3                  |       |
|                      |                                 | Other industrial solvent     | -                                                               |                      | 5.0                   | 0.2                  |       |
|                      |                                 | Other industries             | 3.0                                                             | 0.8                  | -                     |                      |       |
| Industrial pollution | 5.1                             | On road vehicle              | 12.0                                                            | 3.1                  | 10.0                  | 0.3                  | 16.8  |
| Vehicle              | 21.0                            | -                            | -                                                               | -                    | -                     | -                    | 24.4  |
| Fugitive dust        | 18.4                            | -                            | -                                                               | -                    | -                     | -                    | 18.4  |
| Biomass burning      | 4.9                             | -                            | 0.7                                                             | 0.2                  | 1.4                   | 0.0                  | 5.1   |
| Others               |                                 | -                            | 9.8                                                             | 2.6                  | 13.6                  | 0.4                  | 3.0   |
| Total                | 70.8                            | -                            | 100.0                                                           | 26.2                 | 100.0                 | 3.0                  | 100.0 |

**Table S3. The same as Table S2 but for PAES.**

| Source               | Primary apportionment<br>by PMF | Secondary aerosol allocation |                                                                 |                      |                       |                      | Total |
|----------------------|---------------------------------|------------------------------|-----------------------------------------------------------------|----------------------|-----------------------|----------------------|-------|
|                      |                                 | Sector category              | Proportions of<br>SO <sub>2</sub> and NO <sub>2</sub> emissions | Proportion<br>of SIA | Proportion<br>of VOCs | Proportion<br>of SOA |       |
| Coal combustion      | 21.9                            | Power plants                 | 41.5                                                            | 11.0                 |                       |                      | 32.9  |
|                      |                                 | Chemical industry            | 13.0                                                            | 3.4                  | 49.0                  | 1.0                  |       |
|                      |                                 | Steel industry               | 13.0                                                            | 3.4                  | 10.0                  | 0.2                  |       |
| Industrial pollution | 2.3                             | Cement industry              | 7.0                                                             | 1.8                  | -                     | -                    | 13.3  |
|                      |                                 | Coating industry             | -                                                               | -                    | 11.0                  | 0.2                  |       |
|                      |                                 | Other industrial solvent     | -                                                               | -                    | 5.0                   | 0.1                  |       |
|                      |                                 | Other industries             | 3.0                                                             | 0.8                  | -                     | -                    |       |
| Vehicle              | 27.1                            | On road vehicle              | 12.0                                                            | 3.2                  | 10.0                  | 0.2                  | 30.4  |
| Fugitive dust        | 11.5                            | -                            | -                                                               | -                    | -                     | -                    | 11.5  |
| Biomass burning      | 6.2                             | -                            | 0.7                                                             | 0.2                  | 1.4                   | 0.0                  | 6.4   |
| Others               | 2.6                             | -                            | 9.8                                                             | 2.6                  | 13.6                  | 0.3                  | 5.4   |
| Total                | 71.6                            | -                            | 100.0                                                           | 26.4                 | 100.0                 | 2.0                  | 100.0 |

**Table S4. The same as Table S2 but for NUIST.**

| Source               | Primary apportionment<br>by PMF | Secondary aerosol allocation |                                                                 |                      |                       |                      | Total |
|----------------------|---------------------------------|------------------------------|-----------------------------------------------------------------|----------------------|-----------------------|----------------------|-------|
|                      |                                 | Sector category              | Proportions of<br>SO <sub>2</sub> and NO <sub>2</sub> emissions | Proportion<br>of SIA | Proportion<br>of VOCs | Proportion<br>of SOA |       |
| Coal combustion      | 22.4                            | Power plants                 | 41.5                                                            | 10.0                 |                       |                      | 32.4  |
| Industrial pollution | 9.6                             | Chemical industry            | 13.0                                                            | 3.1                  | 49.0                  | 2.9                  | 22.8  |
|                      |                                 | Steel industry               | 13.0                                                            | 3.1                  | 10.0                  | 0.6                  |       |
|                      |                                 | Cement industry              | 7.0                                                             | 1.7                  | -                     | -                    |       |
|                      |                                 | Coating industry             | -                                                               | -                    | 11.0                  | 0.7                  |       |
|                      |                                 | Other industrial solvent     | -                                                               | -                    | 5.0                   | 0.3                  |       |
|                      |                                 | Other industries             | 3.0                                                             | 0.7                  | -                     | -                    |       |
| Vehicle              | 21.0                            | On road vehicle              | 12.0                                                            | 2.9                  | 10.0                  | 0.6                  | 24.5  |
| Fugitive dust        | 13.0                            | -                            | -                                                               | -                    | -                     | -                    | 13.0  |
| Biomass burning      | 3.9                             | -                            | 0.7                                                             | 0.2                  | 1.4                   | 0.1                  | 4.1   |
| Others               |                                 | -                            | 9.8                                                             | 2.4                  | 13.6                  | 0.8                  | 3.2   |
| Total                | 69.9                            | -                            | 100.0                                                           | 24.1                 | 100.0                 | 6.0                  | 100.0 |



**Table S5. The contributions of chemical components to the light scattering for accumulation mode particles based on the Mie theory (Unit: %).**

| Locations | (NH <sub>4</sub> ) <sub>2</sub> SO <sub>4</sub> | NH <sub>4</sub> NO <sub>3</sub> | OM   | others |
|-----------|-------------------------------------------------|---------------------------------|------|--------|
| NJU       | 24.3                                            | 25.5                            | 31.0 | 16.6   |
| PAES      | 21.3                                            | 23.6                            | 29.4 | 23.1   |
| NUIST     | 25.8                                            | 18.7                            | 32.9 | 20.4   |

## Figures

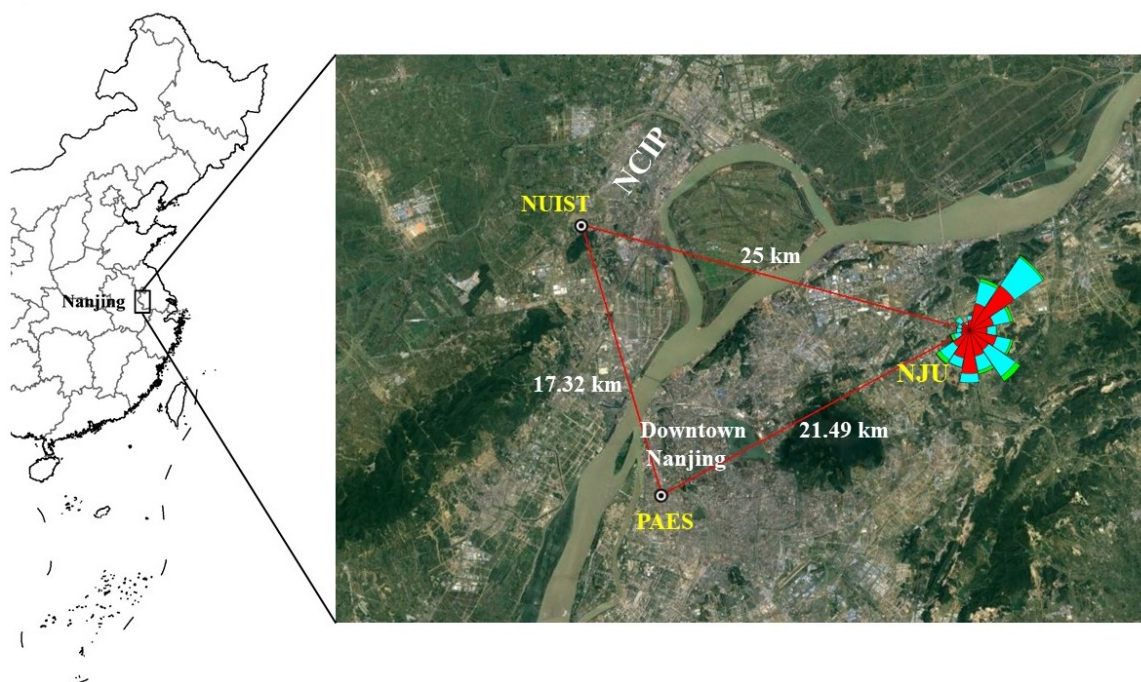

**Figure S1.** The locations of NJU, PAES and NUIST sites in Nanjing. The map data provided by © Google (Google Earth) are freely available for academic use (<http://www.google.cn/intl/zh-CN/earth/>).

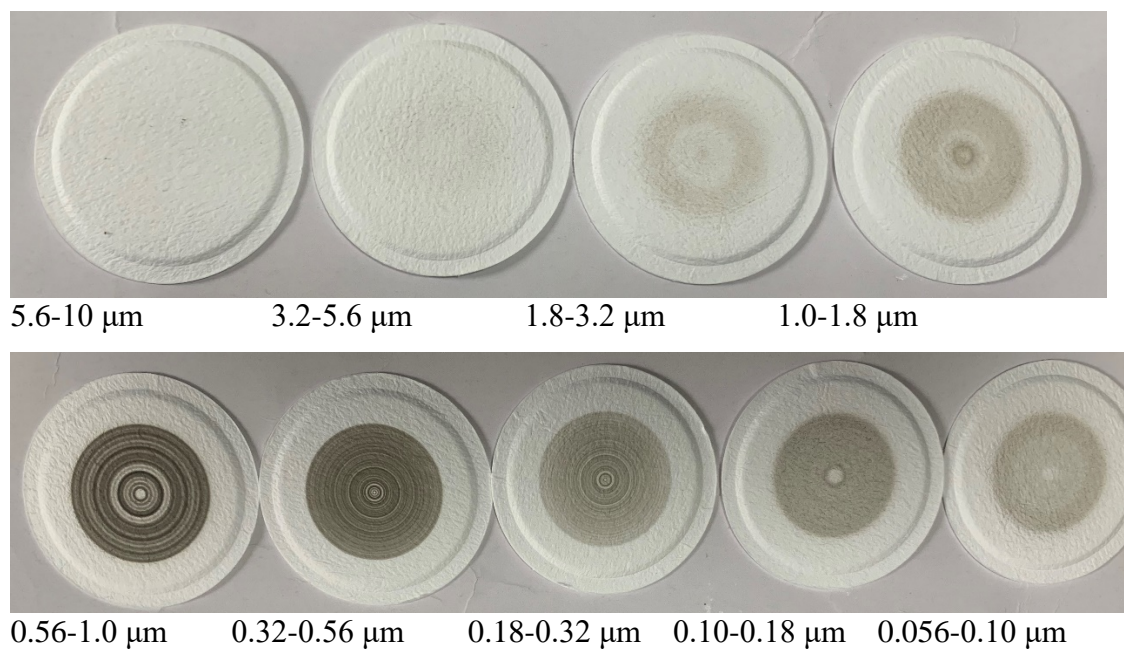

**Figure S2.** A set of size-resolved particle filter samples on 25 Dec 2015 at NJU. The measured PM<sub>1.8</sub> and PM<sub>2.5</sub> were 128 and 141  $\mu\text{g}/\text{m}^3$ , respectively.

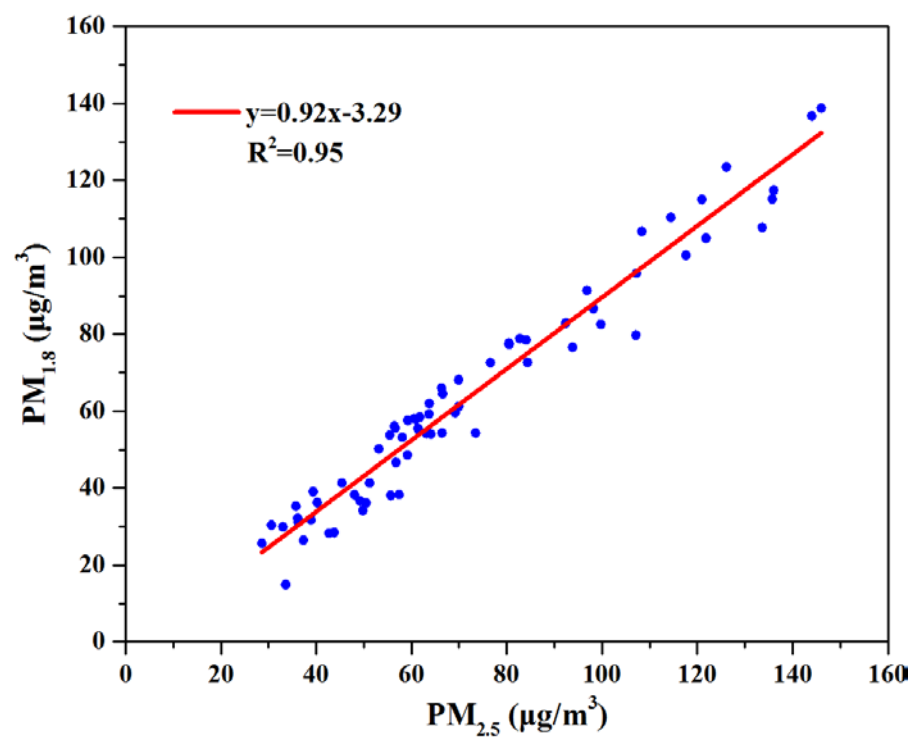

**Figure S3. Correlation between the mass concentrations of PM<sub>1.8</sub> collected with MOUDI impactor and PM<sub>2.5</sub> collected with TH-150C sampler at NJU.**

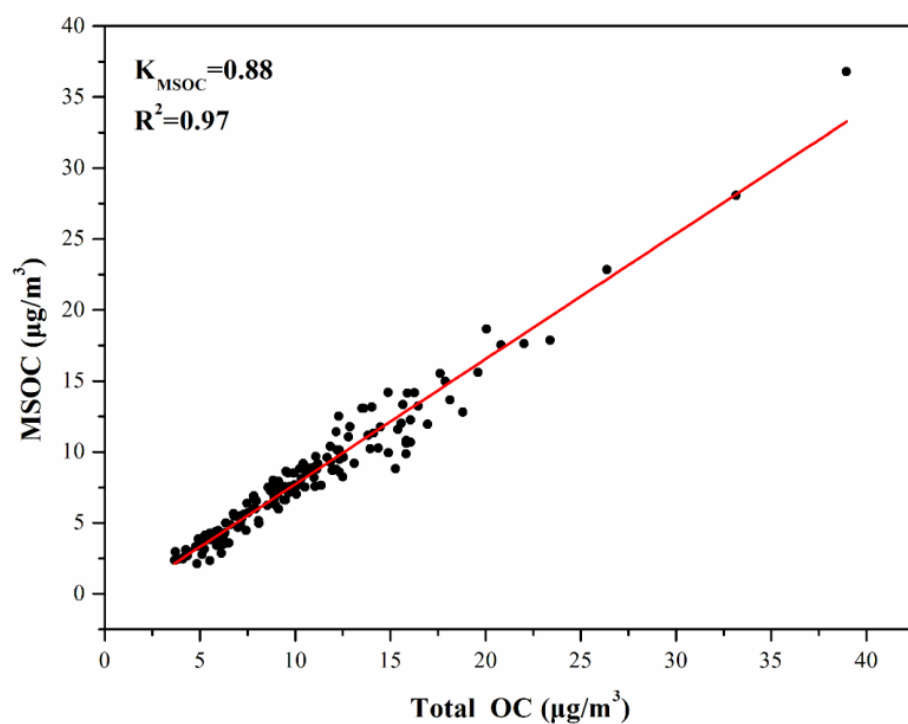

**Figure S4. Correlation between MSOC and total OC for all the samples collected in this work. The red line indicates linear regression result with K as slope (intercept is set at zero).**

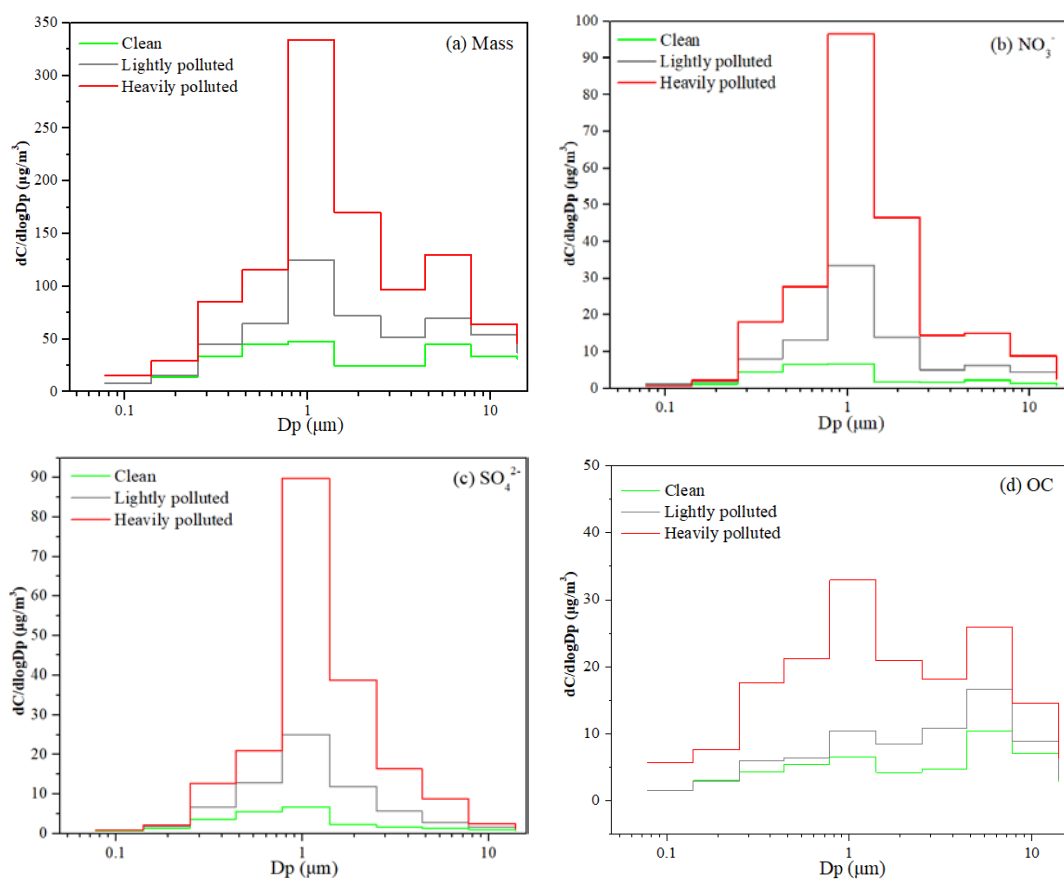

**Figure S5.** The size distribution of mass concentrations of particles and their main chemical components for the three pollution level periods.

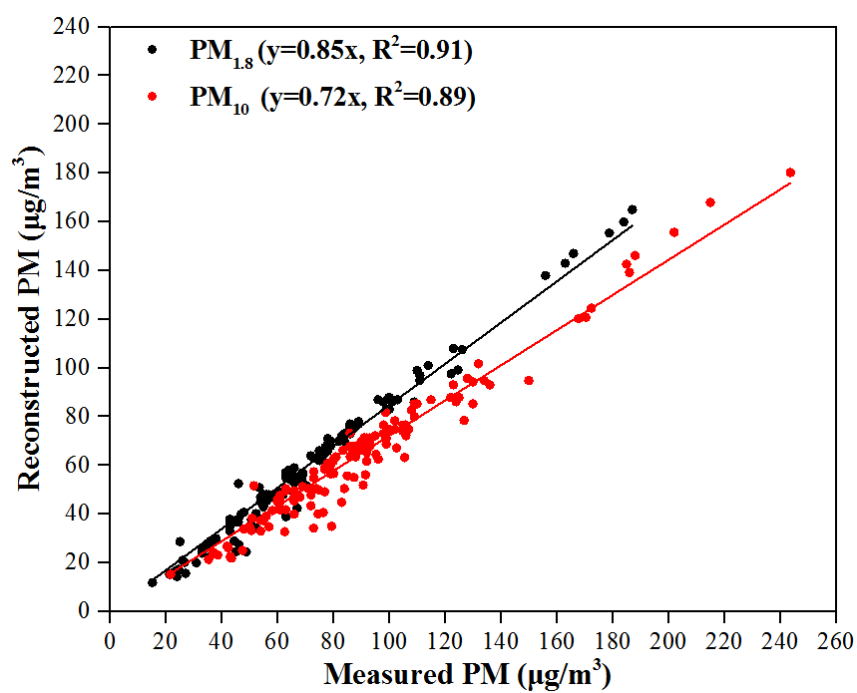

**Figure S6.** The relationship between the reconstructed and measured PM mass concentrations at the three sites.

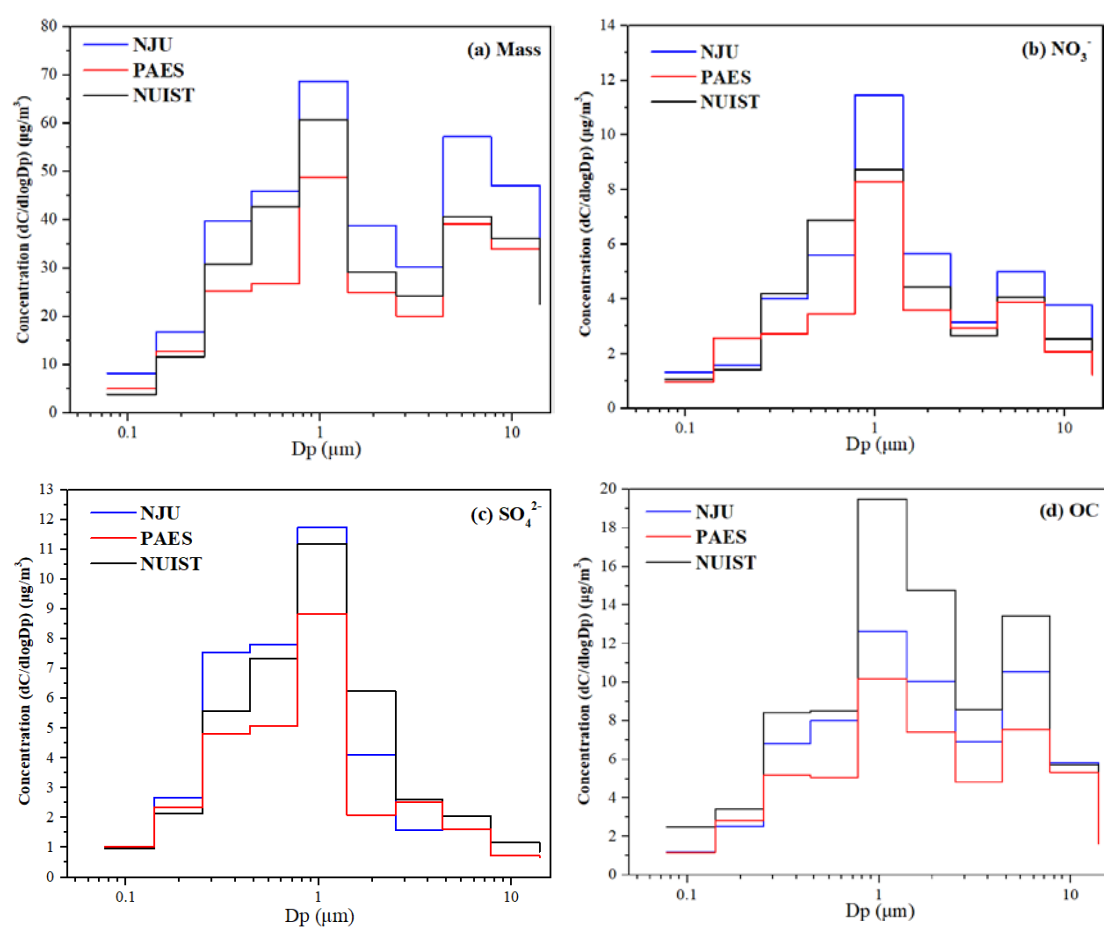

**Figure S7.** The size distribution of mass concentrations of particles and their main chemical components at NJU, PAES and NUIST.



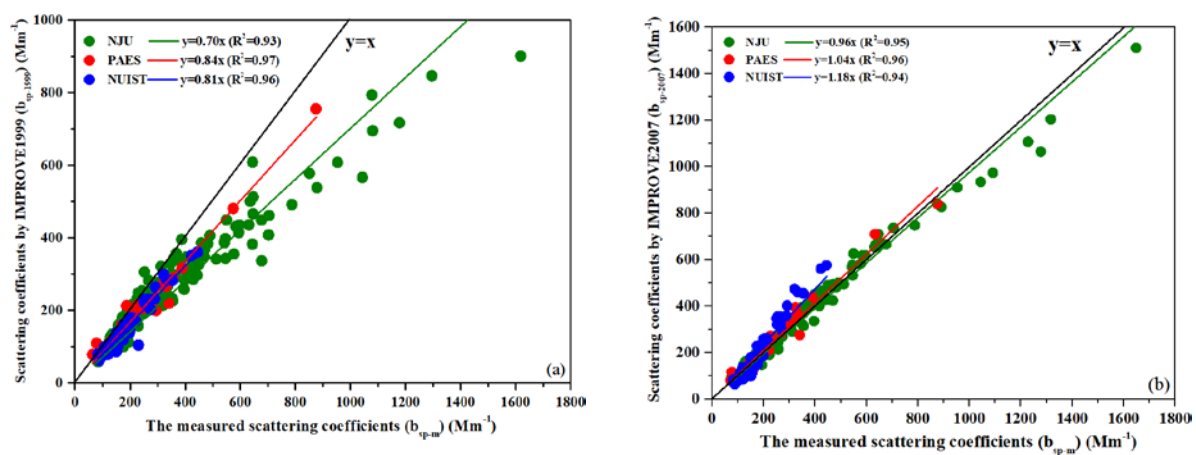

**Figure S8. Linear regressions between the measured daily scattering coefficients and those calculated with the IMPROVE1999 algorithm (a) and the IMPROVE2007 algorithm (b) at the three sites.**

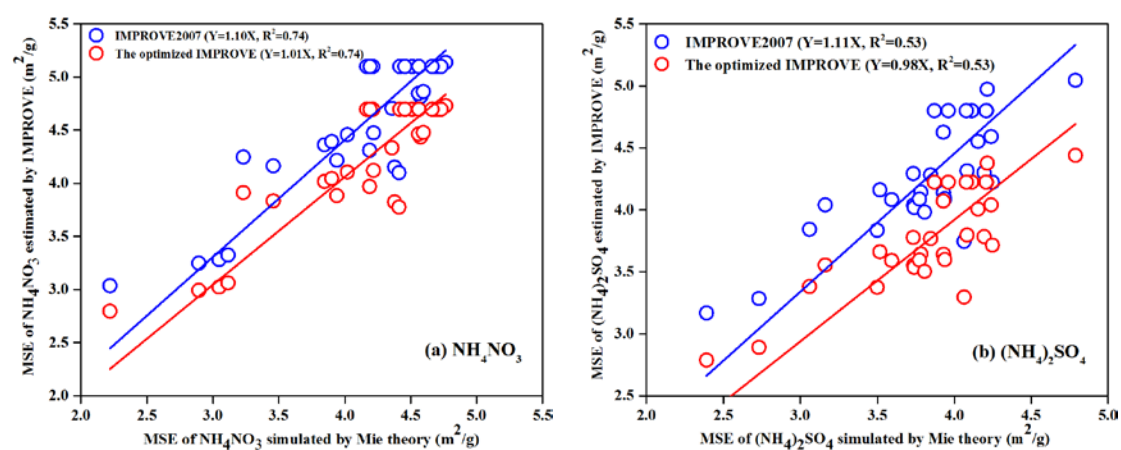

**Figure S9. Linear regressions between the mass scattering efficiencies (MSE) of  $\text{NH}_4\text{NO}_3$  (a) and  $(\text{NH}_4)_2\text{SO}_4$  (b) estimated with the Mie theory and those with the two version of US IMPROVE algorithms.**

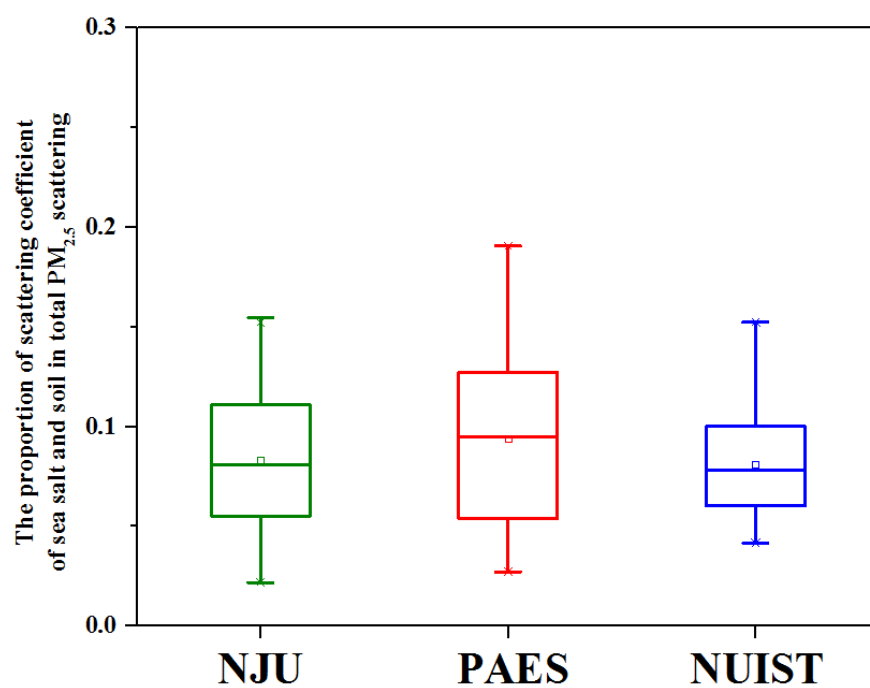

**Figure S10** The collective proportions of sea salt and soil dust to the total  $PM_{2.5}$  scattering coefficient at the three sites based on the IMPROVE2007 algorithm.

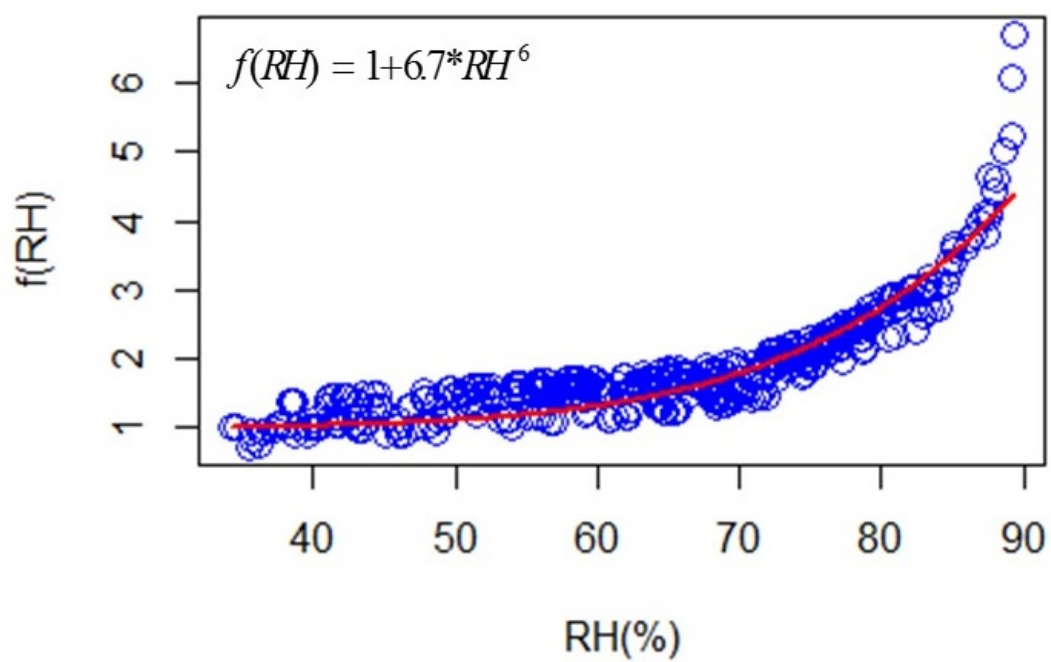

**Figure S11. Scattering hygroscopic growth curve of PM<sub>2.5</sub> at NJU.**

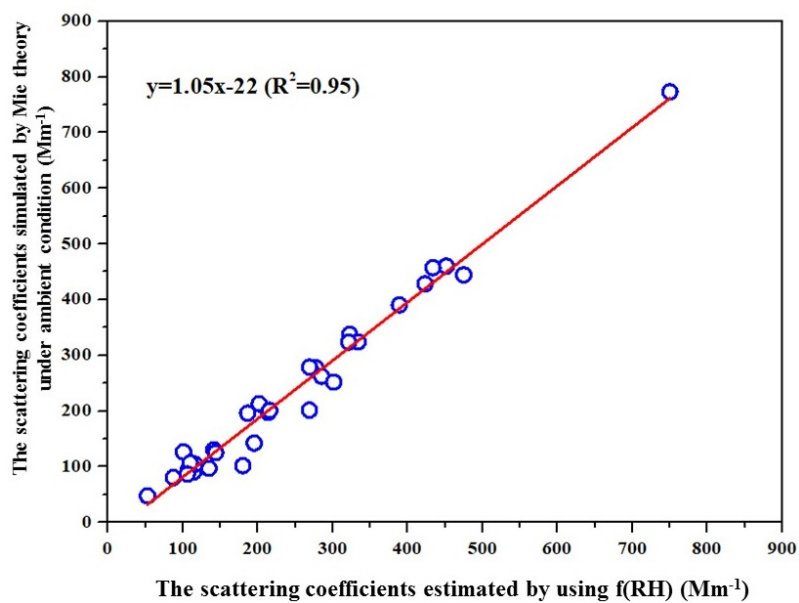

**Figure S12.** The correlation between the scattering coefficients estimated by f(RH) and those simulated with Mie theory under the ambient conditions.

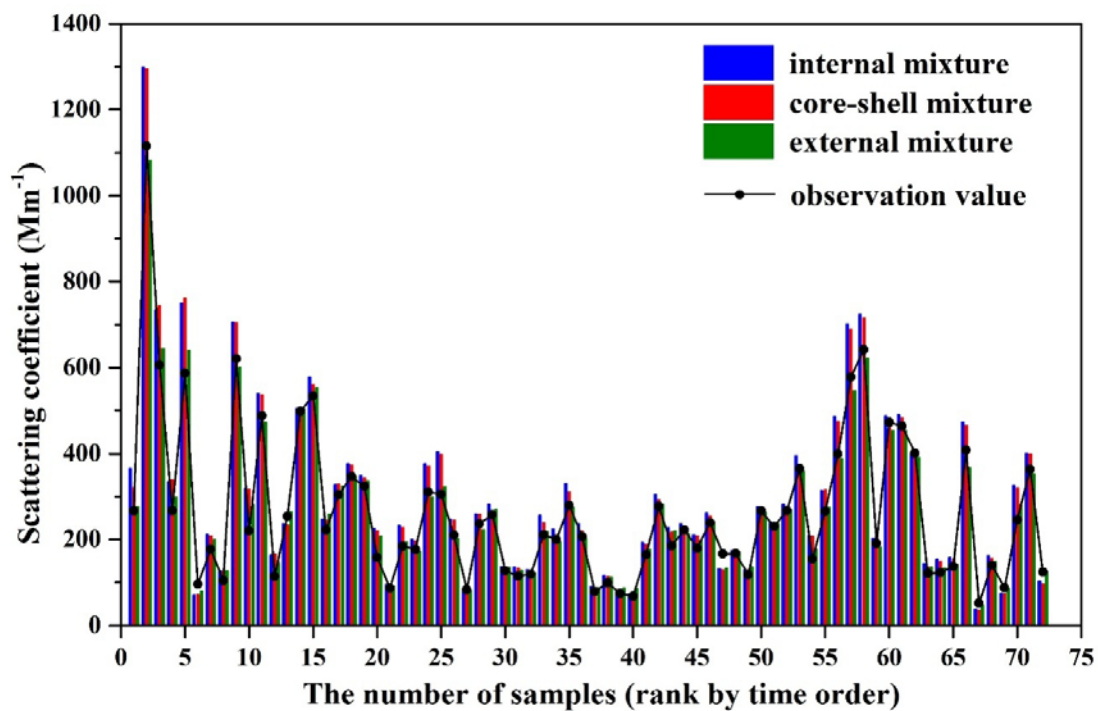

**Figure S13.** The comparison of the observed scattering coefficients and those estimated with the external, internal, core-shell mixture assumption under the ambient condition at NJU.

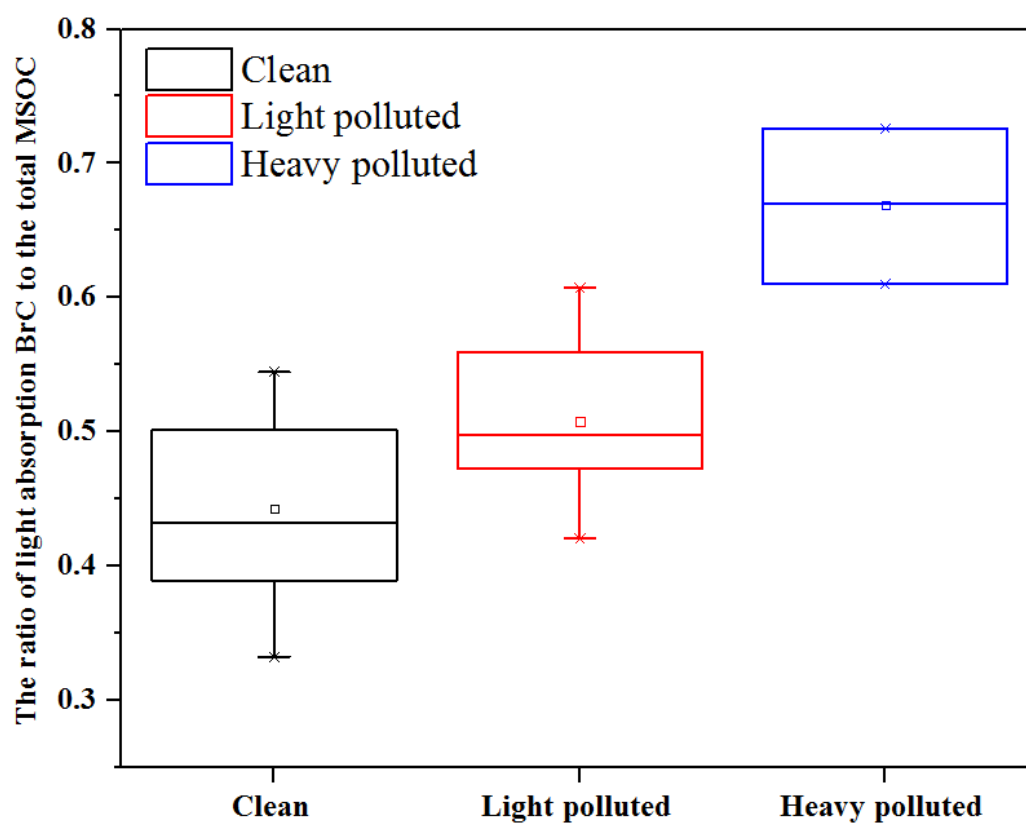

**Figure S14.** The box plots of the ratios of light absorption BrC mass to the total BrC mass under the three pollution levels. The box plots indicate the mean concentration (square symbols) and the maximum, 99th, 75th, 50th, 25th, 1st percentiles, and minimum.

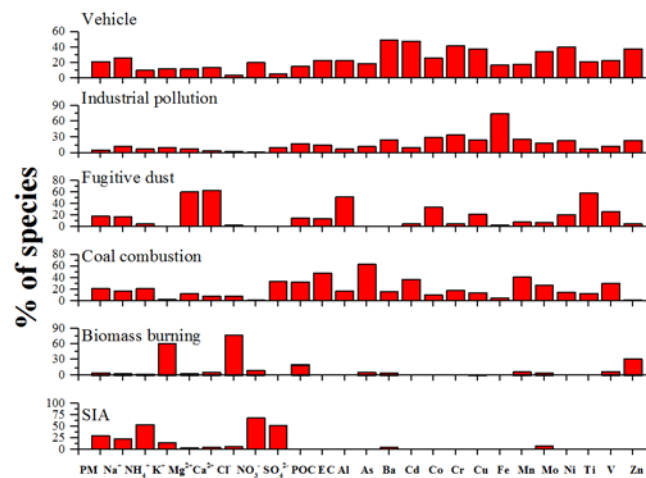

(a)

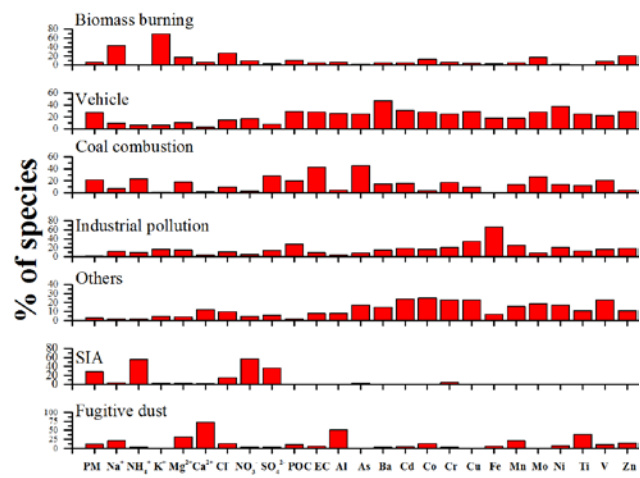

(b)

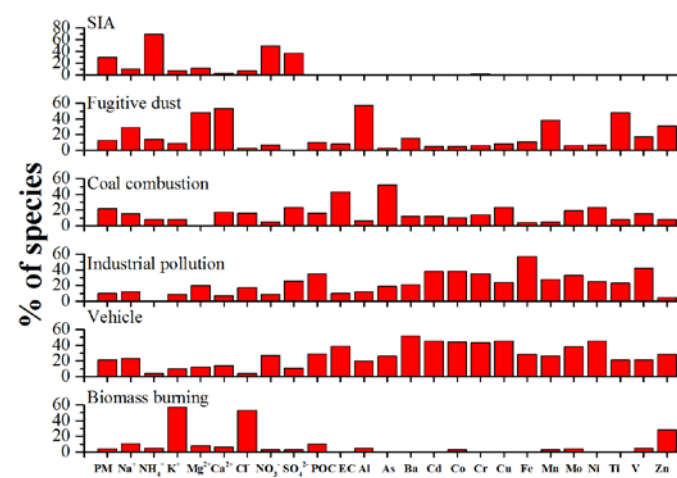

(c)

**Figure S15.** The source profiles for accumulation mode particles from the PMF model at NJU (a), PAES (b) and NUIST (c).



## REFERENCES

- Li, Q., Yin, Y., Gu, X. S., Yuan, L., Kong, S. F., Jiang, Q., Chen, K., Li, L.: An observational study of aerosol hygroscopic growth factor and cloud condensation nuclei in Nanjing in summer, *China Environ. Sci.*, 35, 337-346, 2015.
- Pitchford, M., Malm, W., Schichtel, B., Kumar, N., Lowenthal, D., Hand, J.: Revised algorithm for estimating light extinction from IMPROVE particle speciation data, *J. Air Waste Manag. Assoc.*, 57, 1326-1336, doi:10.3155/1047-3289.57.11.1326, 2007.
- Wu, Y. X.: Observations of aerosol hygroscopic properties-Case study results over Mt. Huang and Nanjing, MA thesis, Nanjing University of Information Science & Technology, 2014.
- Xu, B., Zhang, Z. F., Li, Y. W., Qin, X., Miu, Q., Shen, Y.: Hygroscopic properties of aerosol particles in north suburb of Nanjing in spring. *Environ. Sci.*, 36, 1911-1918, doi:10.13227/j.hjkx.2015.06.001, 2015.
- Yu, X. N., Ma, J., Zhu, B., Wang, H. L., Yan, S. Q., Xia, H.: Effects of Relative Humidity and Aerosol Physicochemical Properties on Atmospheric Visibility in Northern Suburb of Nanjing, *Environ. Sci.*, 36, 1919-1925, 2015.
- Zhang, J., Wang, L., Chen, J. M., Feng, S. M., Shen, J. D., Jiao, L.: Hygroscopicity of ambient submicron particles in urban Hangzhou, China, *Fron. of Environ. Sci. & Engin. in China*, 5, 342-347, 2011.
